# Supplementary material for: A generative pretrained transformer model for decoding individual glucose dynamics from continuous glucose monitoring data
Source: Research Square preprint supplement (doi:10.21203/rs.3.rs-3932671/v1), 2024-02-22
Supplement: Supplementary file 1 [file ac1e0c1c163fd8999fed4bb1.docx]

**Supplementary Information for**

**A generative pretrained transformer model for decoding individual glucose dynamics from continuous glucose monitoring data**

**Supplementary notes**

**Dynamic Network Biomarker**

We introduce the theoretical background of the dynamic network biomarker (DNB) theory. Firstly, we consider the following discrete-time dynamical system that represents the dynamic evolution of a district network:

(1)

where is an -dimensional state vector or variables at time instant that represents districts or cities in the system, while is a parameter vector or driving factors that represent slowly changing/evolution factors. Mappings are generally nonlinear functions. For such dynamic evolution function Eq. (1) with the parameter *P*, there is a bifurcation or critical state if some transversal conditions hold.

1. is a fixed point of system such that .
2. There is a value such that one or a pair of the eigenvalues of the Jacobian matrix is equal to 1 in the modulus. And this Jacobian matrix is diagonalizable.
3. When , the eigenvalues of the linearized function of are not always equal to 1 in the modulus.

The above three conditions with other transverse conditions imply that the system undergoes a phase change at or a bifurcation when reaches the threshold. For system Eq. (1) near and before reaches , we assume that the system is at a hyperbolic stable fixed point and thus all of the eigenvalues are within (0, 1) in modulus. The parameter value at which the state shift of the system occurs, is known as a bifurcation parameter value or a critical transition value.

Assuming that the state approaches a saddle-node bifurcation point for the case of simplicity, the generic properties in dynamics of Eq. (1) was theoretically derived by introducing new variables and a transformation matrix , such that

. (2)

With the variable transformation Eq. (2), a linearized form of the original system Eq. (1) is presented as

(3)

where is the diagonalized matrix of , and are small Gaussian noises with zero means and the covariance . The norm in the diagonalized matrix is between 0 and 1, implying that the system is at a stable state initially. Thus, for the standard deviation and covariance of abstract variable , there are the following expressions [1].

(4)

(5)

Denote the dominant eigenvalue as the largest eigenvalue or eigenvalues (the case of multiple roots) in modulus, which characterize the system’s rate of change around a fixed point. Then, the before-transition/normal stage corresponds to a period when the dominant eigenvalue is far smaller than 1 in modulus (as parameter is far away from ). The critical stage corresponds to the period when the dominant eigenvalue approaches to 1 in modulus (as parameter ). Clearly, when the dominant eigenvalue , there is .

Back to the original system of , when the largest eigenvalue (or eigenvalue pairs) approaches 1 in modulus, there are three generic codimension-one bifurcations of the system (i.e., the saddle-node, period-doubling, and Neimark-Sacker bifurcations). Specifically, when the dominant eigenvalue is real, the critical point is the saddle-node bifurcation (transcortical and pitchfork) if the dominant eigenvalue approaches 1, while the critical point is the period-doubling (or flip) bifurcation if the dominant eigenvalue approaches -1. When the dominant eigenvalues are a pair of complex conjugate eigenvalues (including several pairs with the same modulus), the critical point is the Neimark-Sacker bifurcation. According to our previous work [1-3], we have the following results.

1. When the dominant eigenvalue is real, there is only one dominant group related to variable  in Eq. (3). Among this dominant group, each variable has nonzero coefficient in the transformation matrix of Eq. (2), and has standard deviation (SD)

(6)

and Pearson correlation coefficient (PCC) with other variables

(7)

For this case, when parameter, increases sharply, and increases to 1 (if is also in this dominant group).

2. When the dominant eigenvalues and are a pair of complex conjugate eigenvalues, then there are two dominant groups respectively related to and in Eq. (3). In each of the dominant group, a variable has standard deviation

(8)

where is a bounded value, and Pearson correlation coefficient with other variable

(9)

where , and are bounded values. In each dominant group, when parameter, both and increases sharply (if is also in the same dominant group).

For the original system Eq. (1), when the dynamical system approaches a critical point (bifurcation point), at least a dominant group appears and can be defined as the dynamic network biomarker (DNB), which meets the following two necessary conditions in terms of the observed data with noise.

(1) The coefficient of variation for any element in the DNB group rapidly increases.

(2) The absolute Pearson's correlation coefficient between the DNB elements rapidly increases.

The above two conditions are generic properties of the state transition at a tipping point, which can be approximately stated as: the occurrence of a strongly fluctuating and highly correlated group of elements implies an upcoming transition into the after-transition stage.

**Supplementary tables**

**Table S1. Statistics for nationwide multi-center CGM study.**

|  | NGT | IGR | T2D |
| --- | --- | --- | --- |
| Age | 43.29 (14.37) | 55.79 (10.95) | 53.04 (11.87) |
| BMI (kg/m2) | 22.11 (2.09) | 24.47 (3.08) | 25.82 (3.64) |
| LDL-C (mmol/l) | 2.72 (0.84) | 2.99 (0.87) | 3.09 (0.94) |
| HDL-C (mmol/l) | 1.56 (0.40) | 1.33 (0.43) | 1.23 (0.30) |
| HbA1c (%) | 5.51 (0.46) | 5.81 (0.38) | 7.58 (1.50) |
| FPG (mg/dl) | 86.35 (7.93) | 104.89 (10.87) | 141.12 (42.98) |
| PG120 (mg/dl) | 96.95 (20.69) | 154.12 (28.02) | 263.80 (84.96) |
| INS0 (μU/ml) | 11.30 (4.38) | 13.78 (7.00) | 16.08 (10.31) |
| INS120 (μU/ml) | 46.06 (31.89) | 83.40 (66.90) | 79.66 (65.73) |
| HOMA-β | 173.13 (82.40) | 128.11 (79.23) | 90.08 (63.99) |
| HOMA-IS | 0.47 (0.20) | 0.35 (0.18) | 0.27 (0.25) |

**Table S2. Hyperparameter in CGMformer pretraining and finetuning.**

| **Hyperparameter** | **Value** |
| --- | --- |
| *Pretraining* | |
| Total Number of Parameters | 881,674 |
| Number of Transformer Layers | 4 layers |
| Transformer Layer Embedding Size | 128 |
| Transformer Layer Hidden Dimension | 512 |
| Number of Transformer Heads | 8 heads |
| Initializer_range | 0.02 |
| Layer_norm_eps | 1e-12 |
| Attention_probs_dropout_prob | 0.02 |
| Hidden_dropout_prob | 0.02 |
| Weight_decay | 0.001 |
| Max_lr | 4e-4 |
| lr_schedule_fn | linear |
| optimizer | adamw |
| Transformer Layer Activation Function | gelu |
| Transformer Layer Normalization | LayerNorm |
| Pre-trained CGM sequence length | 288 |
| Total Training Epochs | 3000 epochs |
| Warmup Epochs | 2000 epoch |
| GPU type | NVIDIA 3080Ti-12GB |
| Number of Nodes | 1 machine |
| Total Number of GPUs | 2 GPUs |
| Per GPU Batch Size | 48 |
| Token Embedding MLP Layer Dimensions (Transformer) | 512,128 |
| MLP Layer Activation Function | gelu |
| MLP Layer Normalization | LayerNorm |
| Total Training Time | 3.5h |
| *Fine-tune for T1D/T2D diagnosis and complication diagnosis in Zhao’s dataset* | |
| Max_lr | 4e-4 |
| Frozen layers | 0 |
| Num_gpus | 1 |
| Num_proc | 16 |
| Batch_size | 48 |
| lr_schedule_fn | cosine |
| epochs | 20 |
| warmup_steps | 100 |
| optimizer | adamw |
| CLS Token Decoder MLP Layer Dimensions (Transformer) | 512,128,2 |
| *Fine-tune for NGT/IGR/T2D diagnosis in nationwide multi-center dataset* | |
| Max_lr | 4.1e-4 |
| Frozen layers | 0 |
| Num_gpus | 1 |
| Num_proc | 16 |
| Batch_size | 12 |
| lr_schedule_fn | cosine |
| epochs | 20 |
| warmup_steps | 1300 |
| optimizer | adamw |
| CLS Token Decoder MLP Layer Dimensions (Transformer) | 512,128,3 |

**Table S3. Description for CGM derived Metrics.**

| **Metric** | **Short description** |
| --- | --- |
| above_percent (above_140, above_180, above_250, TAR) | Percentage of measured glucose values above target thresholds. |
| below_percent (below_54, below_70, TBR) | Percentage of measured glucose values below target thresholds. |
| in_range_percent (in_range_63_140, in_range_70_180, TIR) | Percentage of measured glucose values in targeted value ranges. |
| HBGI | High Blood Glucose Index (HBGI) , where , the ith Blood Glucose measurement for a subject, and n is the total number of measurements  for that subject. |
| LBGI | Low Blood Glucose Index (LBGI) , where , the ith Blood Glucose measurement for a subject, and n is the total number of measurements  for that subject. |
| ADRR | Average daily risk range, the average sum of HBGI corresponding to the highest glucose value and LBGI corresponding to the lowest glucose value for each day, with the average taken over the daily sums. |
| COGI | Continuous Glucose Monitoring Index (COGI) |
| CONGA | Continuous Overall Net Glycemic Action (CONGA) is the standard deviation of the difference between glucose values that are exactly n hours apart. CONGA is computed by taking the standard deviation of differences in measurements separated  by n hours. |
| CV | Coefficient of Variation (CV) of glucose levels. |
| CV_Measures (CV_Measures_Mean, CV_Measures_SD) | Coefficient of Variation subtypes. CV_Measures_Mean is calculated by first taking the coefficient of variation of each day’s glucose measurements, then taking the mean of all the coefficient of variation. CV_Measures_SD is calculated by first taking the coefficient of variation of each day’s glucose measurements, then taking the standard deviation of all the coefficient of variations. |
| eA1C | Estimate A1C. eA1C score is calculated by where BG is the vector of Blood Glucose Measurements (mg/dL). |
| GMI | GMI score is calculated by where BG is the vector of Blood Glucose  Measurements (mg/dL). |
| GRADE | Glycemic Risk Assessment Diabetes Equation (GRADE) score is calculated by, where is the ith  Blood Glucose measurement and n is the total number of measurements |
| grade_eugly, grade_ hyper, grade_hypo | Percentage of GRADE score attributable to target range, hyperglycemia, and hypoglycemia |
| GRI | Glycemia Risk Index (GRI) , where VLow, Low, VHigh, and High correspond to the percent of glucose values in the ranges <54 mg/dL, 54-70 mg/dL, >250 mg/dL, and 180-250 mg/dL respectively. |
| GVP | Glucose Variability Percentage (GVP) is calculated by dividing the total length of the line of the glucose trace by the length of a perfectly flat trace. |
| hyper_index | Hyperglycemia Index is calculated by , Here n is the total number of Blood Glucose measurements (excluding NA values), is the jth Blood Glucose measurement above the ULTR cutoff, a is an exponent, and c is a scaling factor. |
| hypo_index | Hypoglycemia Index is calculated by , Here n is the total number of Blood Glucose measurements (excluding NA values), is the jth Blood Glucose measurement below the LLTR cutoff, b is an exponent, and d is a scaling factor. |
| IGC | Index of Glycemic Control (IGC) is calculated by taking the sum of the Hyperglycemia Index and the Hypoglycemia index. |
| IQR | The distance between the 25th percentile and the 25th percentile of the glucose values. |
| J-Index | J-Index score is calculated by where BG is the list of Blood Glucose Measurements. |
| MAD | Median Absolute Deviation (MAD) is calculated by taking the median of the difference of the glucose readings from their median and multiplying it by a scaling factor , where gl is the list of Blood Glucose measurements. |
| MAG | Mean Absolute Glucose (MAG) is calculated as where is the sum of the absolute change in blood glucose calculated for each interval as specified by n, default n= 60 for hourly change in blood glucose. |
| MAGE | Mean Amplitude of Glycemic Excursions |
| Mean | Mean glucose level |
| Median | Median glucose level |
| MODD | Mean difference between glucose values obtained at the  same time of day (MODD) |
| M_value | M-value is computed by averaging the transformed glucose values, where each transformed value is equal to , where r is the specified reference value. |
| Quantiles (Min., 1st, 3rd, Max.) | Minimum, 1st quantile, 3rd quantile, maximum of the input glucose measurements. |
| Range | The distance between minimum and maximum glucose values. |
| SD | Standard Deviation (CV) of glucose levels. |
| SD_measurements (SDw, SDhhmm, SDwsh, SDdm, SDb, SDbdm, SD. Roc) | SD subtype values, including vertical within days (SDw), between time points (SDhhmm), within series (SDwsh), horizontal sd (SDdm), between days with in timepoints (SDb), between days within timepoints and corrected for changes in daily means (SD bdm), SD of the rate of change values (SD. Roc) |

**Supplementary figure legends**

**Fig S1. Nationwide multi-center CGM study.** a. Geographical distribution of enrolled subjects in nationwide multi-center CGM study. b. Clinical measurements in nationwide multi-center CGM study. wt: Weight(kg).

**Fig S2. CGM data collected from Nationwide multi-center CGM study.** a. CGM derived metrics in nationwide multi-center CGM study. b. Correlation between CGM-derived metrics and clinical measurements. Descriptions for the CGM-derived metrics are listed in **Table S3**. c. Correlation analysis of CGM-derived metrics.

**Fig S3. Ablation study for model hyperparameters.** a. Accuracy for token prediction (left: normal glycemia, center: hyperglycemia, right hypoglycemia) during pretraining with different hidden space dimension. b. Accuracy for label prediction (NGT/IGR/T2D diagnosis) with different hidden space dimensions. c. The global reconstruction accuracy during pretraining with different masking strategy. d. Accuracy for label prediction (NGT/IGR/T2D diagnosis) with different masking strategy. e. Accuracy for label prediction (NGT/IGR/T2D diagnosis) with different input sequence size. f. Accuracy for label prediction (NGT/IGR/T2D diagnosis) with individual representation strategy. g. UMAP visualization for <CLS> token based individual representation with clinical diagnosis.

**Fig S4. UMAP visualization for individual clinical measurements and CGM derived metrics.** Pretrained CGMformer individual embeddings align well with individual clinical measurements (a) as well as CGM-derived measurements (b). CGM-derived metrics in (b) includes: Mean: Mean glucose level, eA1C: estimated A1C, GRADE: Glycemic Risk Assessment Diabetes Equation score, HBGI: High Blood Glucose Index, LBGI: Low Blood Glucose Index, above_140: percentage of measured glucose values above threshold (140mg/dl), above_180: percentage of measured glucose values above threshold (180mg/dl), MAGE: Mean Amplitude of Glycemic Excursions, SD: standard deviation, ADRR: average daily risk range. Detailed descriptions for these metrics refer to **Table S3**.

**Fig S5.** a. Comparison of age, BMI, and insulin among individual from NGT, IGR, T2D, and HV-NGT. HV-NGT tend to have similar distribution in age and BMI indexes but distant insulin level with NGTs. b. CGM profile and corresponding attention weights from another day recorded by Shanghai_NGT_A183. c. Another example from HV-NGT show the attention weights can learn the dynamics during fasting phase and post-meal phase.

**Fig S6.** a. Accuracy for assisting diagnosis NGT/IGR/T2D with feature extracting methods including SVM and SGD. b. Accuracy for assisting diagnosis NGT/IGR/T2D, T1D/T2D, complication, microvascular, and macrovascular, comparing with combining CGM derived metrics with machine learning methods including Ridge regression classifier, MLP classifier, and SGD classifier. c. Recall score in predicting T2D from different clinical critical, comparing with baseline methods, including machine learning methods and diagnosis from CGM derived metrics. Clinical critical for different measurements are as follows: FPG7mmol/L; HbA1c6.5%; PG12011.1mmol/L. d. Heatmap for attention weights in different glucose level and dynamic phase after finetuning. e. Comparison for attention weights in different glucose level and dynamic phase after finetuning with pretraining. f. The line chart shows the accuracy of diagnosis with the increasing of pretraining volume.

**Fig. S7.** ab. Comparison of FPG (a) and HbA1c (b) from samples grouped with finetuned CGMformer predicted results, hued by follow-up outcome. cd. ROC (c) and PRC (d) for predicting follow-up outcome with CGMformer, DNB_SD, HbA1c, and FPG.

**Fig. S8.** a. Schematic for calculating CGMformer_C from embedding vector encoded by CGMformer. The embedding vectors are encoded through 2-linear layers into 1-dimensional indexes, and then decoded with multi-task regression loss-function to optimize model and obtain CGMformer_C. b. KDE plot estimates the distribution of CGMformer_C from NGT/IGR/T2D. cd. Scatter plot for CGMformer_C with clinical measurements from nationwide multi-center dataset (c) and Zhao’s dataset (d).

**Fig S9.** a. Mean and variation during the fasting and post-meal phases for individuals from each subtype. b. CGM derived metrics for individuals from each subtype. HBGI: high blood glucose index. low%: fraction of time with low glucose variability, calculated from glucotype; severe %: fraction of time with severe glucose variability, calculated from glucotype. c. Clinical measurements for individuals from each subtype.

**Fig. S10.** a. Detailed schematic for CGMformer_Diet. b. Pearson correlation coefficient for CGMformer_Diet predicted post-meal glucose with real post-meal glucose, grouped by different energy supply ratio of meal intake. c. Comparison of predicted post-meal glucose with real post-meal glucose of several meals from one individual validates the results for dietary perturbation based on CGMformer_Diet.
