# Supplementary figures and images for: A generative pretrained transformer model for decoding individual glucose dynamics from continuous glucose monitoring data
Source: Research Square preprint supplement (doi:10.21203/rs.3.rs-3932671/v1), 2024-02-22

a

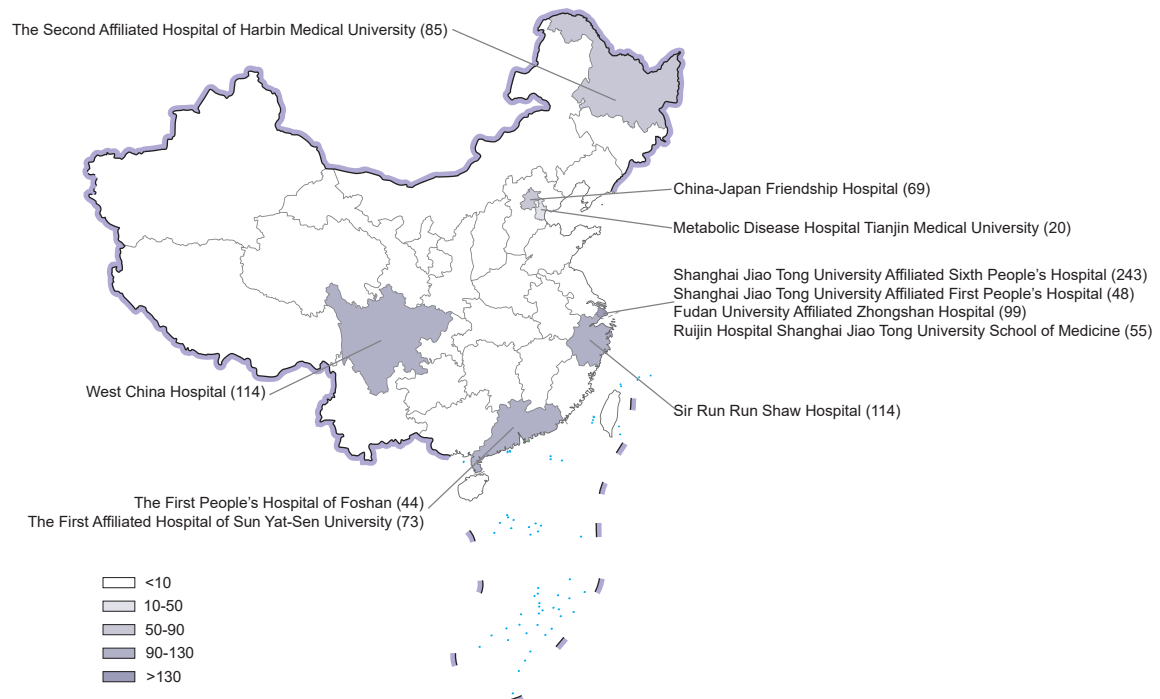

b

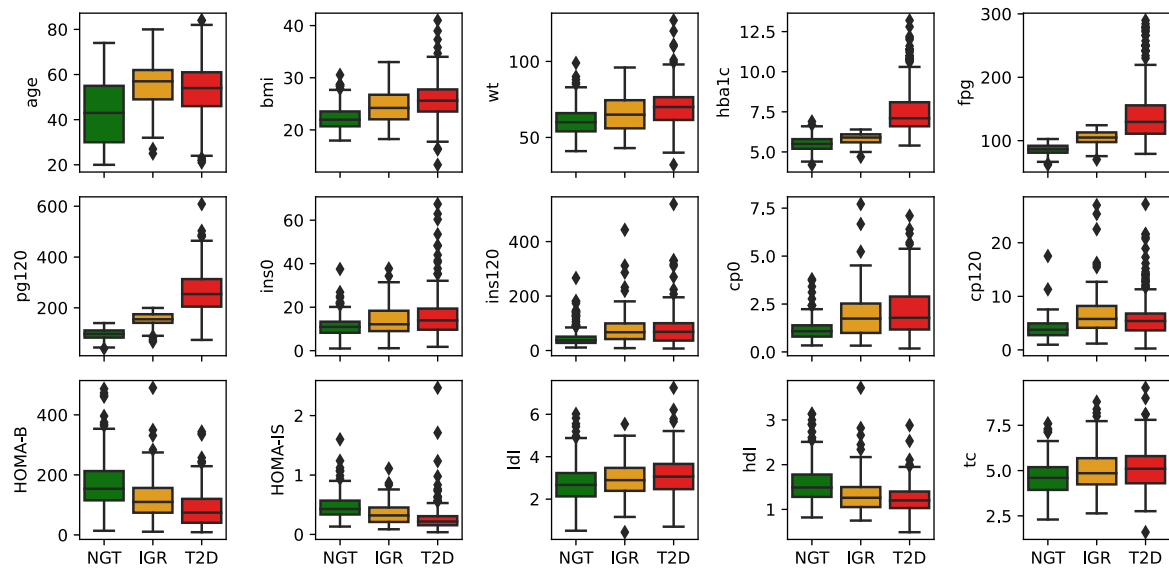

Supplement: Supplementary file 1 [file 386276ce97d0edd16797e1ec.pdf]
